# Supplementary material
Source: PubMed Central journal article supplement (PMC2852475)

**A**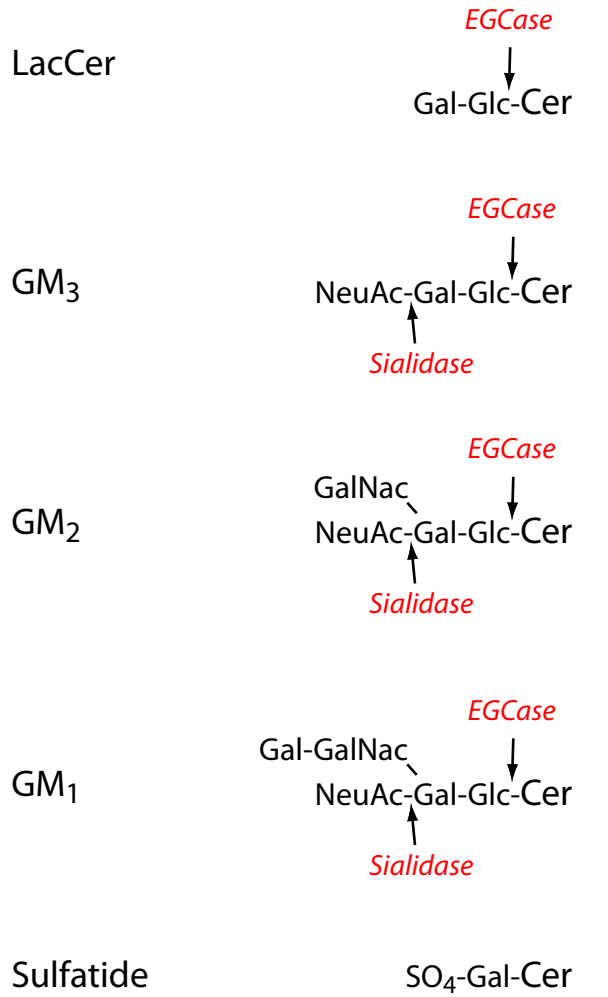

Gal Galactose  
 Glc Glucose  
 GalNac N-acetylgalactosamine  
 NeuAc N-acetyl-neuraminic acid (sialic acid)  
 Cer Ceramide

**B**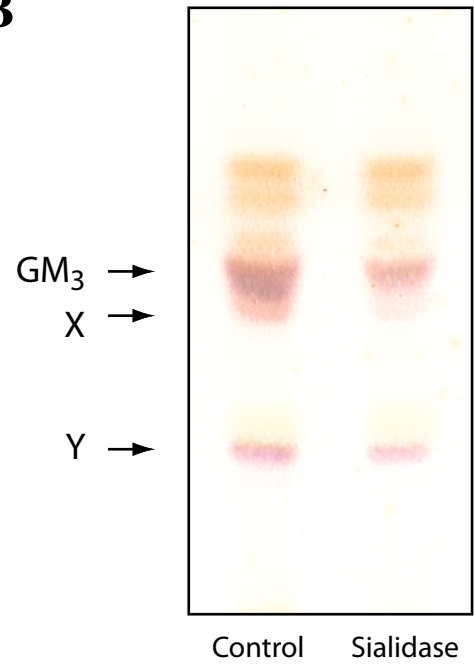

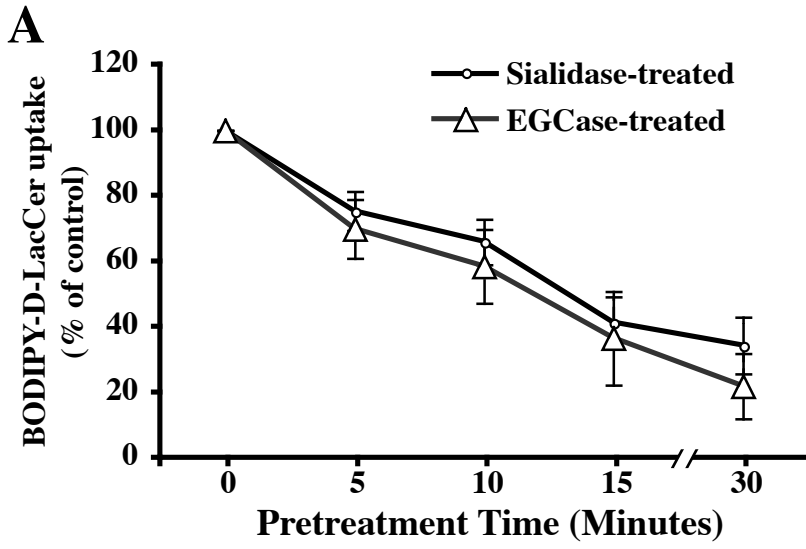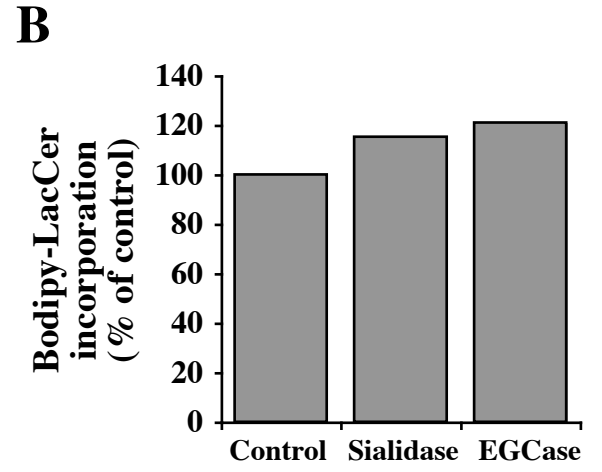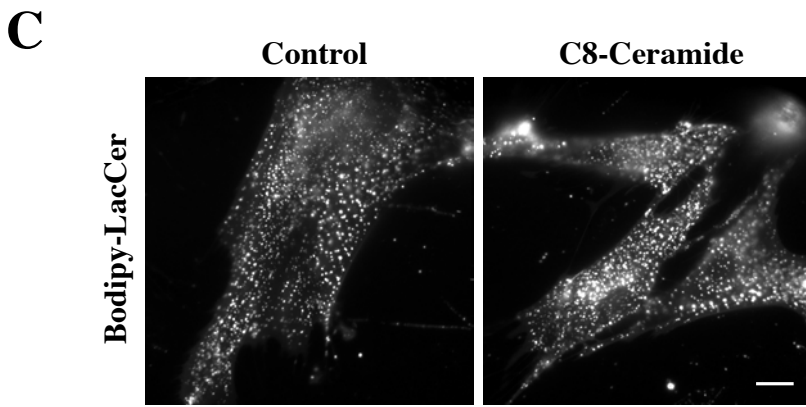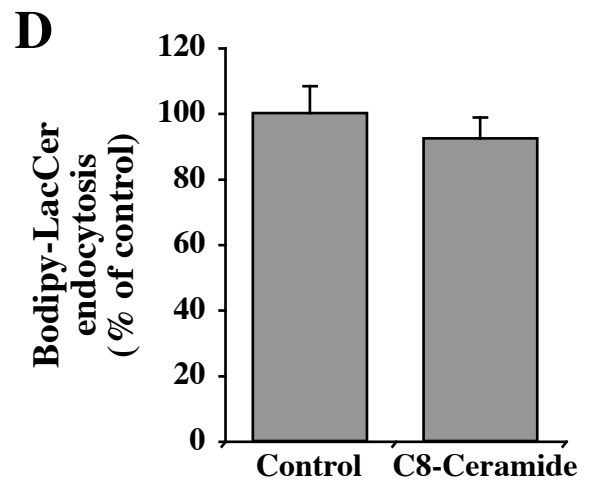

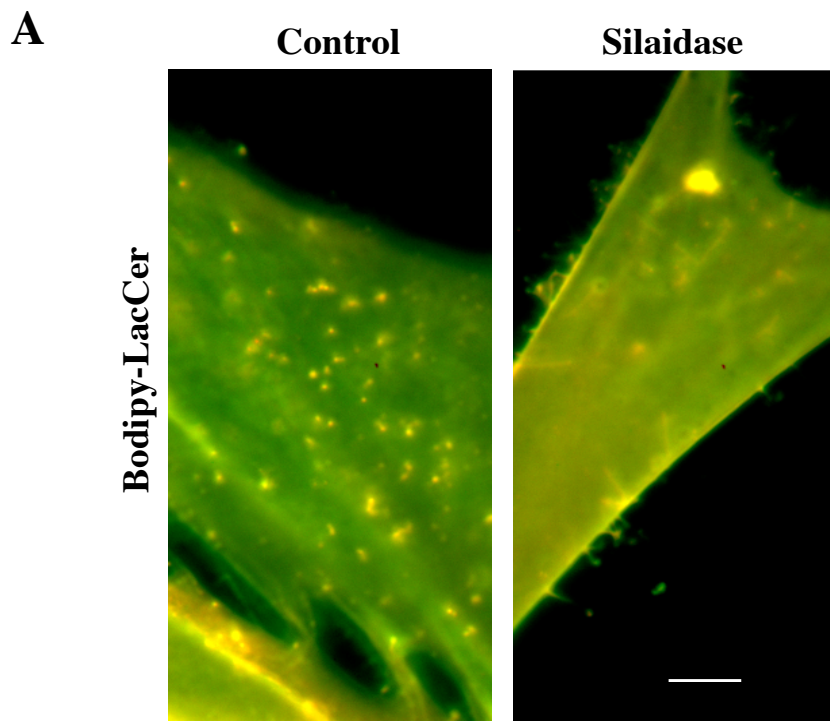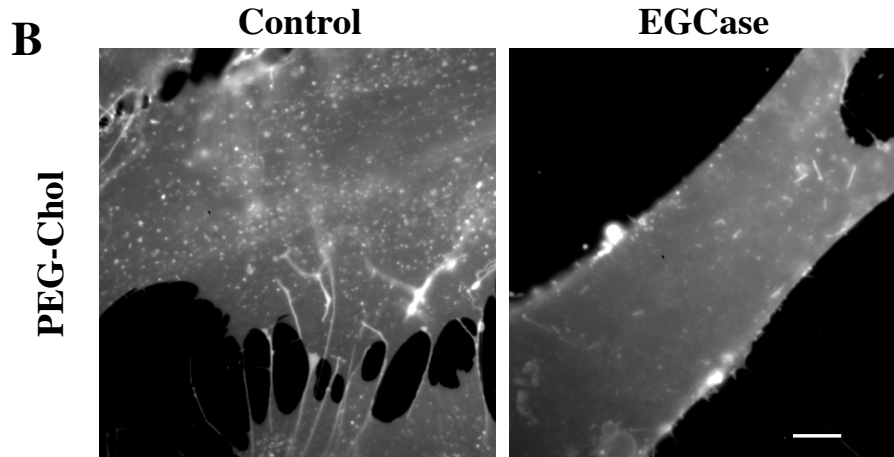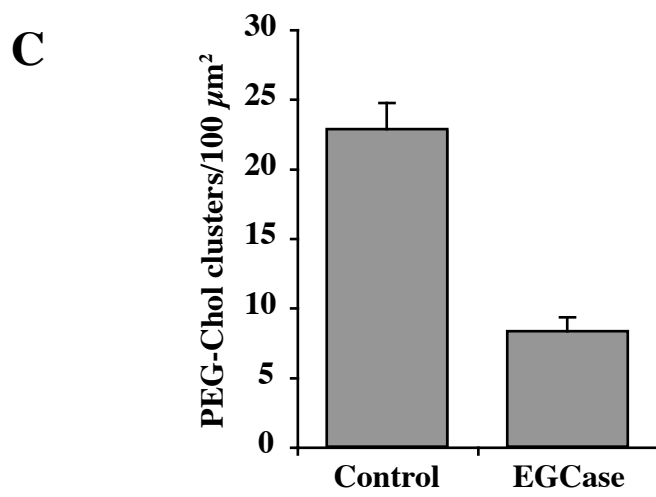

**A**

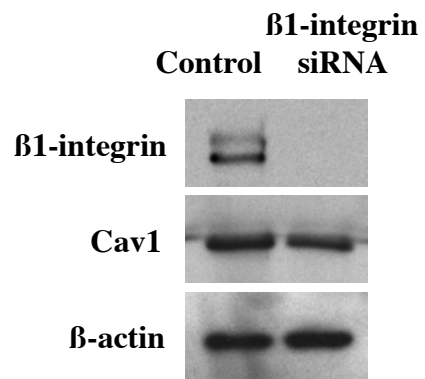

**B**

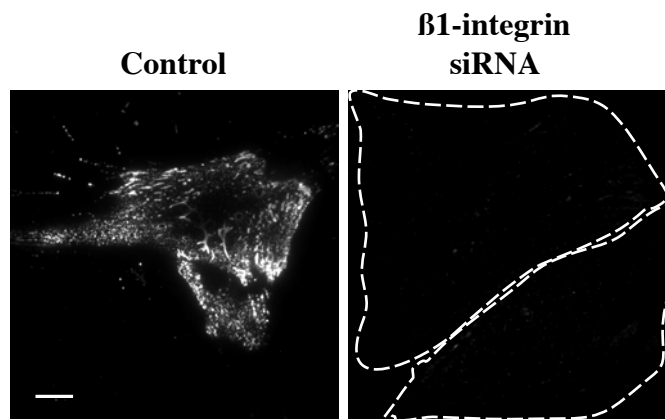

Supplement: NIHMS179790-supplement-01.pdf [file NIHMS179790-supplement-01.pdf]
